# Supplementary material for: Carbonate formation lowers the electrocatalytic activity of perovskite oxides for water electrolysis
Source: Royal Society of Chemistry journal article supplement (doi:10.1039/d1ta03205d), 2021-01-01
Supplement: d1ta03205d1.pdf [file d1ta03205d1.pdf]

# Carbonate formation lowers the electrocatalytic activity of perovskite oxides for water electrolysis

## *SUPPLEMENTARY INFORMATION*

*Christoph Baeumer*<sup>1,2,3,4\*</sup>, *Allen Yu-Lun Liang*<sup>2,5</sup>, *Urška Trstenjak*<sup>6‡</sup>, *Qiyang Lu*<sup>1,2,7</sup>, *Rainer Waser*<sup>3,6</sup>, *J. Tyler Mefford*<sup>1,2</sup>, *Felix Gunkel*<sup>6</sup>, *Slavomír Nemšák*<sup>6,7\*</sup>, *William C. Chueh*<sup>1,2</sup>

- 1 Department of Materials Science and Engineering, Stanford University, Stanford, CA 94305, USA
  - 2 Stanford Institute for Materials and Energy Science, SLAC National Accelerator Laboratory, Menlo Park, CA 94025, USA
  - 3 Institute of Electronic Materials (IWE2) and JARA-FIT, RWTH Aachen University, 52074 Aachen, Germany
  - 4 MESA+ Institute for Nanotechnology, University of Twente, Faculty of Science and Technology, 7500 AE Enschede, Netherlands
  - 5 Department of Chemistry, Stanford University, Stanford, CA 94305, USA
  - 6 Advanced Light Source, Lawrence Berkeley National Laboratory, Berkeley, California 94720, USA
  - 7 Peter Gruenberg Institute and JARA-FIT, Forschungszentrum Juelich GmbH, 52425 Juelich, Germany
- ‡ Present address: Advanced Materials Department, Jožef Stefan Institute, SI-1000 Ljubljana, Slovenia

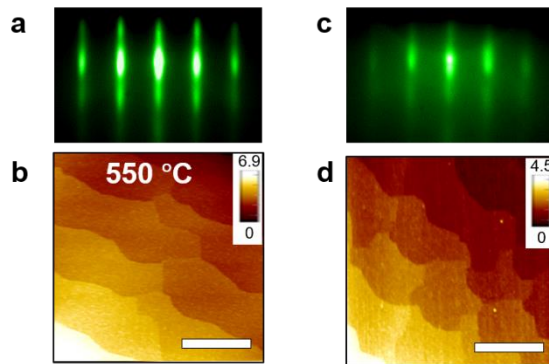

Supplementary Figure 1: (a) RHEED pattern after growth. (b) Atomic force microscopy after UHV-transfer to the AFM chamber. (c) RHEED pattern after electrochemical characterization. The intensity of the electron beam was identical and all settings as similar to panel a as possible. The loss in intensity of the diffraction spots compared to the background intensity indicates a slight loss of surface crystallinity. (d) Atomic force microscopy after electrochemical characterization.

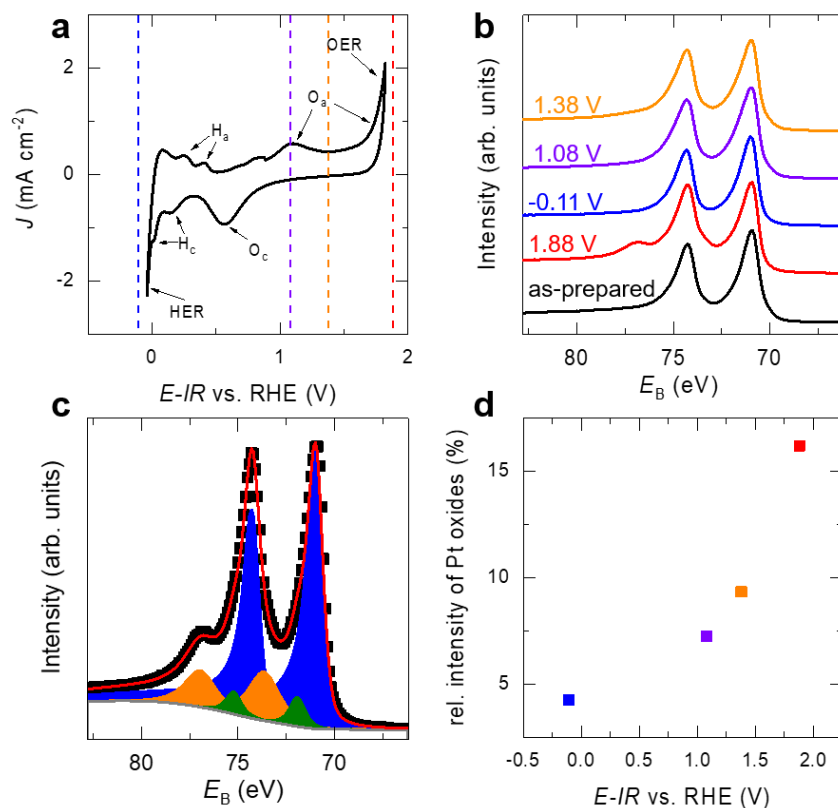

Supplementary Figure 2: (a) Cyclic voltammetry of a 50 nm Pt layer at 500 mV/s. The redox features are labeled according to Bard and Faulkner.<sup>19</sup> H<sub>c</sub>/H<sub>a</sub>: formation/oxidation of adsorbed hydrogen. O<sub>a</sub>/O<sub>c</sub>: formation/reduction of adsorbed oxygen or a platinum oxide layer. (b) Pt 4f XPS after deposition and after potential holds at different potentials as indicated in panel a. First, the film was oxidized at 1.88 V vs. RHE, then it was reduced at -0.11 V vs. RHE, followed by reoxidation at 1.08 and 1.38 V vs. RHE, respectively. (c) representative XPS fitting of the Pt 4f level. (d) Relative intensity of the Pt oxide peaks as a function of applied potential.

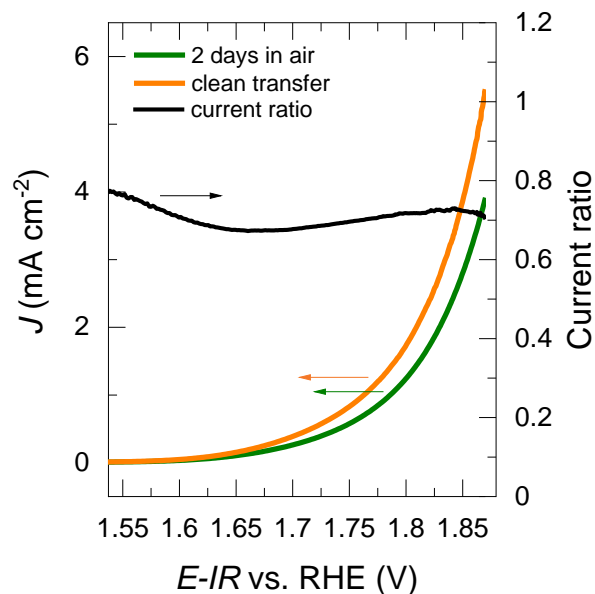

Supplementary Figure 4: (a) Cyclic voltammety of the same films as in Figure 2 of the main text and current normalization: The current ratio was obtained by dividing the data from the air-exposed sample by the clean-transfer data. The ratio is fairly constant at  $\sim 70$  to  $80$  %.

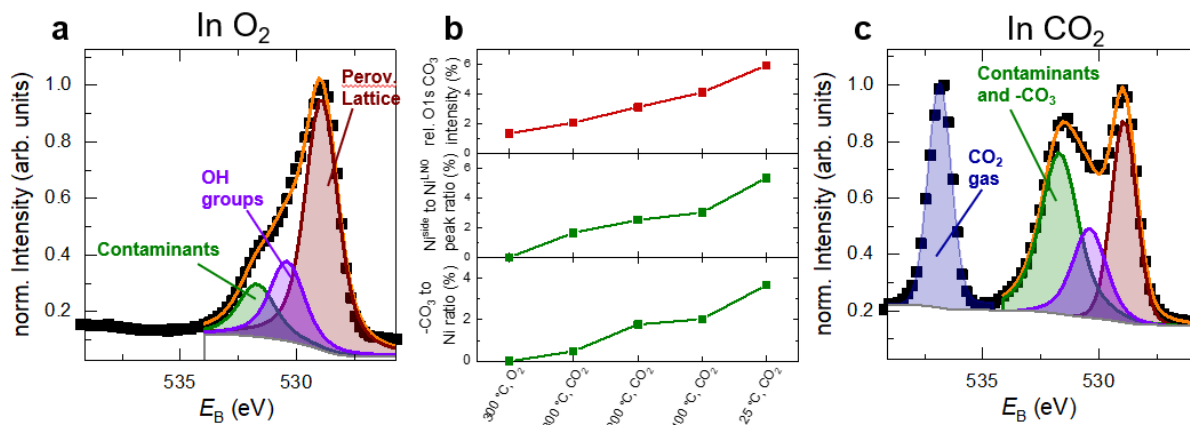

Supplementary Figure 3: (a) O1s spectrum of a  $\text{LaNiO}_3$  film in  $\text{O}_2$  at 300 °C. The surface is clean except for a small contamination peak often observed for perovskite oxides (doi/10.1021/acs.chemmater.9b05151) (b) Top panel: Increase of the peak corresponding to the O  $1s^{\text{CO}_3}$  and contaminations during cooling down in  $\text{CO}_2$ . Based on their binding energy, these peaks could not be separated unambiguously. Middle and bottom panel: Intensity ratio of the C  $1s^{\text{CO}_3}$  peak and the total Ni  $3p$  intensity (same data as shown in Fig. 5 of the main text). (c) O1s spectrum of the same film after cooling down to room temperature in  $\text{CO}_2$ .
